# Supplementary material for: Risk factors for severe acute respiratory syndrome coronavirus 2 (SARS-CoV-2) infections: a nationwide population-based study
Source: PubMed Central journal article supplement — Ann Transl Med. 2021 Feb;9(3):211. doi: 10.21037/atm-20-5958 (PMC7940880; doi:10.21037/atm-20-5958), 2021-02
Supplement: atm-09-03-211-dss.pdf [file atm-09-03-211-dss.pdf]

## Data Sharing Statement

|                     |                                                                                                                                                    |                                                                                                                                                                                                                                                                                                                                       |
|---------------------|----------------------------------------------------------------------------------------------------------------------------------------------------|---------------------------------------------------------------------------------------------------------------------------------------------------------------------------------------------------------------------------------------------------------------------------------------------------------------------------------------|
| <b>Article Info</b> | <a href="http://dx.doi.org/10.21037/atm-20-5958">http://dx.doi.org/10.21037/atm-20-5958</a>                                                        |                                                                                                                                                                                                                                                                                                                                       |
| <b>Item</b>         | <b>Question</b>                                                                                                                                    | <b>Authors' Response<br/>(place "-" if not applicable)</b>                                                                                                                                                                                                                                                                            |
| 1                   | Would you like to share data collected for your study to others?                                                                                   | Yes.                                                                                                                                                                                                                                                                                                                                  |
| 2                   | If not, would you like to share the reason for your decision?                                                                                      |                                                                                                                                                                                                                                                                                                                                       |
| 3                   | What data in particular will be shared?                                                                                                            | The association between potential risk factor and SARS-CoV-2 infection will be shared, which has seldom been provide in previous studies.                                                                                                                                                                                             |
| 4                   | Any other documents will be share? Such as study protocol, statistical analysis plan, informed consent form, clinical study report, analytic code. | Statistical analysis plan, Analytic code will be shared if requested.                                                                                                                                                                                                                                                                 |
| 5                   | When will data availability begin?                                                                                                                 | From the publication date.                                                                                                                                                                                                                                                                                                            |
| 6                   | When will data availability end?                                                                                                                   | Two years within the publication date.                                                                                                                                                                                                                                                                                                |
| 7                   | To whom will you share the data?                                                                                                                   | Medical researcher who are interested in studies of SARS-CoV-2 infection.                                                                                                                                                                                                                                                             |
| 8                   | For what type of analysis or purpose?                                                                                                              | For analysis to evaluate the potential risk factor of SARS-CoV-2 infection.                                                                                                                                                                                                                                                           |
| 9                   | How or where can the data/documents be obtained?                                                                                                   | Emails could be sent to the address below to obtain the shared data: fortune22c@nhimc.or.kr                                                                                                                                                                                                                                           |
| 10                  | Any other restrictions?                                                                                                                            | We need to balance the potential benefits and risks for each request and then provide the data that could be shared. There are some restriction because we got the data from the Ministry of Health and Welfare, and the Health Insurance Review & Assessment Service of Korea for sharing the national health insurance claims data. |
